1           **A ligated intestinal loop mouse model protocol to study the interactions of**  
2           ***Clostridioides difficile* spores with the intestinal mucosa during aging.**

3

4           Pablo Castro-Córdova<sup>1,2</sup>, María José Mendoza-Leon<sup>1,2</sup>, Daniel Paredes-Sabja<sup>1,2,3</sup>.

5

6           <sup>1</sup> Microbiota-Host Interactions and Clostridia Research Group, Departamento de Ciencias  
7           Biológicas, Facultad de Ciencias de la Vida, Universidad Andrés Bello, Santiago, Chile.

8           <sup>2</sup> ANID-Millennium Science Initiative Program - Millennium Nucleus in the Biology of the  
9           Intestinal Microbiota, Santiago, Chile.

10           <sup>3</sup> Department of Biology, Texas A&M University, College Station, Texas, USA.

11

12   Running Title:

13   Key Words: *C. difficile* spores, spore adherence, spore entry, aging, intestinal ligated loop,  
14   ileal loop, colonic loop, intestinal mucosa

15

16   \*Corresponding Author. Dr. Daniel Paredes-Sabja, Department of Biology, Texas A&M  
17   University, College Station, TX, 77843, USA. E-mail: [dparedes-sabja@bio.tamu.edu](mailto:dparedes-sabja@bio.tamu.edu)

18 **AUTHOR CONTRIBUTIONS**

19 **Conceptualization:** Pablo Castro-Córdova, Daniel Paredes-Sabja.

20 **Data curation:** Pablo Castro-Córdova, María José Mendoza-León, Daniel Paredes-Sabja.

21 **Formal analysis:** Pablo Castro-Córdova; Daniel Paredes-Sabja.

22 **Funding acquisition:** Daniel Paredes-Sabja.

23 **Investigation:** Pablo Castro-Córdova, María José Mendoza-León, Daniel Paredes-Sabja.

24 **Methodology:** Pablo Castro-Córdova, Daniel Paredes-Sabja.

25 **Project administration:** Daniel Paredes-Sabja.

26 **Resources:** Daniel Paredes-Sabja.

27 **Supervision:** Daniel Paredes-Sabja.

28 **Writing – original draft:** Pablo Castro-Córdova, Daniel Paredes-Sabja.

29 **Writing – review & editing:** Pablo Castro-Córdova, Daniel Paredes-Sabja.

30

31 **ABSTRACT**

32 The interaction of the *Clostridioides difficile* spores with the intestinal mucosa contribute to  
33 the persistence and recurrence of the infection. Advanced age is one of the main risk factors  
34 to manifest *C. difficile* infection and recurrence. However, the interaction of *C. difficile*  
35 spores with the intestinal mucosa during aging has not been evaluated. In the present work,  
36 we provide a detailed protocol with all the critical information to perform an intestinal ligated  
37 loop. Using this technique in a mouse model, we evaluated *C. difficile* spore adherence and  
38 internalization to the ileum and colonic mucosa during aging. Consequently, our data suggest  
39 that spore internalization in the ileum and colonic mucosa is higher in elderly than in adults  
40 or young mice. Also, our data suggest that spore-adherence to the ileum and colonic mucosa  
41 decreases with aging.

42

## 43 INTRODUCTION

44 *Clostridioides difficile* is a Gram-positive, anaerobic, and spore former bacterium that  
45 is the leading pathogen causing hospital acquiring diarrhea associated with antibiotics [1, 2].  
46 The *C. difficile* infection (CDI) is characterized by the manifestation of diarrhea that can  
47 produce mild to watery diarrhea, abdominal pain, and tenderness [3]. In severe cases, patients  
48 can become dehydrated or produce toxic megacolon [3]. CDI is lethal in ~5% of the infected  
49 patients [4, 5]. The ~15–30% of recovered of *C. difficile* diarrhea manifest a recurrent CDI  
50 (R-CDI) [5, 6].

51

52 The main two risk factors for CDI are the continuous alteration of the microbiota  
53 caused by antibiotics, and age over 65 years old [7, 8], being the 91% of the CDI deaths in  
54 this age group [9]. This increasing association in CDI risk with aging may be explained by  
55 age-related physiologic changes such as the immunosenescence and age-related dysbiosis of  
56 the intestinal microbiota causing a reduced the protective role against *C. difficile*. The  
57 immunosenescence is characterized by a progressive decrease in the effectiveness of the  
58 immune system associated with aging, increasing the susceptibility to infections in older  
59 adults due to the impaired innate and adaptive immune response [10]. For example, during  
60 aging occurs a dysfunctional antigen-presenting cell, reduced chemotaxis to inflammatory  
61 stimuli of natural killers, neutrophils [11, 12], reduced activity in bacterial phagocytosis by  
62 monocytes and macrophages [12, 13]. There is also a reduced antibody response to  
63 exogenous antigens and vaccines by B-cells [14]. These changes may be explained by altered  
64 intracellular communication, telomere attrition, epigenetic alterations in the earliest  
65 hematopoietic stem cells [14]. Therefore, elderly patients have an increased risk of bacterial  
66 infections such as CDI.

67

68           Age-related dysbiosis is characterized by a reduced species diversity enriched in pro-  
69 inflammatory commensals bacteria [15]. In particular by a decline of *Bifidobacterium* [16]  
70 and Clostridiales and with enrichment in Proteobacteria and an overrepresentation of  
71 Enterobacteriaceae [14]. That age-related dysbiosis is associated with a reduced protective  
72 role of the microbiota against CDI [17, 18]. For example, it has been reported that fecal  
73 emulsions from geriatrics patients have low inhibitory activity in the growth of *C. difficile* *in*  
74 *vitro* compared with fecal emulsions from healthy adults [17].

75

76           During CDI, *C. difficile* forms metabolically dormant spores that are essential for R-  
77 CDI [19]. Accordingly, with this observation, we developed a surgical procedure of intestinal  
78 ligated loop, which allowed us to demonstrate that *C. difficile* spores are able to adhere and  
79 internalize into the intestinal mucosa contributing to disease recurrence [20]. However,  
80 whether aging affects the adherence and internalization of *C. difficile* spores to the intestinal  
81 mucosa remains unclear. Due to the lack of protocols describing the intestinal ligated loop in  
82 detail, we decided to provide this step-by-step protocol that brings information on critical  
83 points to perform ligated ileum and colonic loop injected with *C. difficile* spores. Also, this  
84 work provides information on the processing and mounting of the tissues to acquire high-  
85 resolution confocal images and quantify the spore adherence and internalization to the  
86 intestinal mucosa. Next, using this technique, we evaluate the spore adherence and  
87 internalization into the intestinal mucosa of young (7-weeks-old), adult (1-year-old), and  
88 elderly mice (2-years-old). Our results suggest that spore adherence decrease with the aging  
89 in both ileum and colonic mucosa. However, suggest that the spore entry is increased in  
90 elderly mice to the intestinal mucosa.

91

## 92 **2.- MATERIAL**

### 93 **2.1 Reagents**

#### 94 Chemicals

- 95 1. Ethanol 95% (Winkler, Chile).
- 96 2. Ophthalmic ointment (Pharmatech, Chile).
- 97 3. Isoflurane USP (Baxter Healthcare, Puerto Rico).
- 98 4. 10% Povidone-iodine solution (DifemPharma, Chile).
- 99 5. Triton 100-X (Merck, Germany).
- 100 6. Sucrose (Winkler, Chile).
- 101 7. Paraformaldehyde (Merck, Germany).
- 102 8. Dako fluorescent mounting medium (Dako, USA).
- 103 9. Bovine serum albumin (Sigma-Aldrich, USA).
- 104 10. Sodium Chloride (Merck, Germany).

105

#### 106 Others

- 107 1. Heating pad (Imetec, Italy).
- 108 2. Extra thick blot paper (BioRad, USA).
- 109 3. Masking tape (3M, USA).
- 110 4. Disposable Razor Schick Xtreme 3 sensitive skin (Schick, USA).
- 111 5. Immersion oil for fluorescence microscopy, type LDF, formula code 387 (Cargille,
- 112 USA).
- 113 6. Microscopy glass slide (Hart, Germany).
- 114 7. Cover slide (Hart, Germany).

- 115 8. Plastic Petri dish (Bell, Chile).
- 116 9. Scotch transparent tape (3M, USA).
- 117 10. Microcentrifuge 1.5mL tubes.
- 118 11. Microcentrifuge 0.5mL tubes.
- 119 12. 500mL autoclavable Glass Bottle (Schott Duran, USA).
- 120 13. 29G insulin syringe (Nipro, USA).
- 121 14. Towel paper.
- 122 15. Surgical silk suture 3/0 HR20 (Tagum).
- 123 16. Vinylic tape (Scotch 3M, USA).
- 124 17. 0.5% bleach.
- 125 18. Virkon-S (DuPont).
- 126
- 127 Material and Equipment.
- 128 1. Stainless-steel surgical tray.
- 129 2. Scalpel.
- 130 3. Watchmaker forceps.
- 131 4. Anatomical forceps, stainless steel.
- 132 5. Anatomical forceps fine, stainless steel.
- 133 6. Forceps Dumont N°5, super fine tips.
- 134 7. Dressing Forceps.
- 135 8. Surgical scissor blunt & sharp tip.
- 136 9. Iris scissors.
- 137 10. Infrared heat lamp light bulb.
- 138 11. Isoflurane chamber with a facemask for mice.

139 12. Orbital shaker.

140 13. Epifluorescent Microscope Olympus BX53.

141 14. Confocal microscope Leica SP8.

142 15. Biosafety cabinet.

143

## 144 **2.2 Solutions**

145 **10× Phosphate buffered saline (PBS):** Stock solution; Calculate the reagents required to  
146 prepare 1L of 1.37 M NaCl, 27 mM KCl, 100 mM Na<sub>2</sub>HPO<sub>4</sub>, 18 mM KH<sub>2</sub>PO<sub>4</sub>, and dissolve  
147 it in 800mL of Milli-Q water. Then the pH was adjusted to 4.5 with HCl and add Milli-Q  
148 water to 1L. Sterilize by autoclaving for 20 min at 121 °C with 15 psi, and store at room  
149 temperature.

150

151 **1× (PBS):** Dilute 10× PBS stock solution 1:9 (100 mL of 10× PBS into 900 mL of Milli-Q  
152 water) and then sterilize by autoclaving for 20 min at 121 °C with 15 psi. Store at room  
153 temperature.

154

155 **Saline solution:** 0.9% NaCl. Dissolve 9 g of NaCl in 1L of Milli-Q water. Pass through 0.45-  
156 µm filters and sterilize by autoclaving for 20 min at 121 °C with 15 psi. Store at room  
157 temperature.

158

159 **Fixing solution:** 30% sucrose in PBS–4% paraformaldehyde. In the first place, a solution of  
160 PBS–4% paraformaldehyde was prepared as follows: for 1L, add 40 g of paraformaldehyde  
161 powder to 800 mL of 1× PBS. Heat to 60 °C in a fume hood (no dot boil). If it does not  
162 dissolve, raise the pH adding 5N NaOH drop by drop until a clear solution is formed. Cool



163 the solution, adjust the pH to 8.0, and adjust the volume to 1L with 1× PBS. Pass through  
164 0.45-µm filter to remove particles. Aliquot in small volume and store at 4 °C for use in 1–2  
165 weeks or store at 20 °C for up to 1 year. To prepare 100 mL of 30% sucrose in PBS–4%  
166 paraformaldehyde, 30 g of sucrose were dissolved in PBS–4% paraformaldehyde with a final  
167 volume of 100 mL.

168

169 **Permeabilizing solution:** a PBS–0.2% Triton X-100 solution was prepared as follows: a  
170 stock solution of 10% Triton X-100 was prepared in PBS. To prepare 10 mL of the stock  
171 solution, dilute 1 mL of Triton X-100 in 9mL of PBS with gentle shaking. PBS–0.2% Triton  
172 X-100 solution was made by dilution 1:49 of the stock with sterilized 1× PBS. The stock  
173 solution was stored at 4 °C.

174

175 **Blocking solution:** PBS–3% BSA solution. To prepare 10 mL of the solution, 0.3g of BSA  
176 was dissolved in 8 mL of 1× PBS, then add PBS to 10mL and sterilize by filtering with 0.2-  
177 µm syringe filter. The solution was stored at 4 °C.

178

### 179 **3.- METHODS**

180 **Mice used.** 7-weeks ( $n = 5$ ), 1-year-old ( $n = 3$ ) and 2-years-old ( $n = 4$ ) C57BL/6 (male or  
181 female) were obtained from the breeding colony at the Departamento de Ciencias Biológicas  
182 of the Universidad Andrés Bello derived from Jackson Laboratories. Mice were housed with  
183 *ad libitum* access to food Prolab RMH 3000 (Prolab, USA) and autoclaved distilled water.  
184 Bedding and cages were autoclaved before use. Mice were housed with 12-h cycle of light  
185 and darkness, at 20–24 °C with 40–60% of humidity. All procedures complied with all ethical

186 regulations for animal testing and research. This study received ethical approval from the  
187 Institutional Animal Care and Use Committee of the Universidad Andrés Bello.

188

### 189 **Biosafety and personal protection elements**

190 During the surgery, the use of personal protective equipment is required, such as a  
191 disposable laboratory coat, goggles, gloves, cap, and mask when you are manipulating the  
192 fixing solution. The surgery is not performed under the biological safety cabinet. However,  
193 all processes that produce aerosol, such as preparing the syringe with *C. difficile* spore  
194 inoculum, opening and cleaning the tissues infected with *C. difficile* spores, were performed  
195 under the biosafety cabinet. Finally, all the used surfaces were disinfected with a solution of  
196 0.5% bleach and 1:200 of Virkon-S.

197

### 198 **Surgery**

199 All surgical procedures were performed under clean but non-sterile conditions. The  
200 surgical scissors and forceps were autoclaved before usage except the forceps Dumont N° 5  
201 that are not autoclavable, so they were washed with soap, 0.5% bleach, and 70% ethanol.

202

### 203 Day 1

204 All the required materials such as isoflurane, povidone-iodine, 70% ethanol, ophthalmic  
205 ointment, heat-pad, a stainless-steel surgical tray attached to an isoflurane mask, syringe with  
206 saline solution, syringes with *C. difficile* spores, silk braided silicon suture, autoclaved towel  
207 paper, masking tape, and the surgical material as forceps, scissors, were organized in a  
208 manner that they are easily accessible to the hand ([Fig 1](#)).

209

210

211 **Fig 1. Surgical preparation for intestinal ligated loop procedure.** In a clean,  
212 disinfected, but non-sterile condition, the surgical instruments were prepared as  
213 follow: (A) isoflurane-USP, (B) silk braided silicon-coated suture 3-0 HR20, (C)  
214 masking tape, (D) ophthalmic ointment, (E) 10% povidone-iodine solution, (F) 70%  
215 ethanol solution, (G) sterilized paper towels, (H) 29G insulin syringe with 100 $\mu$ L  
216 of 0.9% NaCl containing  $5 \times 10^8$  *C. difficile* spores, (I) 29G insulin syringe  
217 containing sterile 0.9% NaCl to hydrate the tissues), (J) surgical scissors  
218 Sharp/blunt, stainless steel, (K) anatomical forceps, stainless steel, (L) anatomical  
219 forceps fine, stainless steel, (M) forceps Dumont N°5, super fine tips.

220

- 221 1. Male or female, 18–25g mice C57BL/6 of 8–12 weeks were fasted overnight (15 h)  
222 before the surgery with free access to water.
- 223 2. Depth anesthesia was induced in ~3min with 4% (vol/vol) isoflurane and a flow of  
224 0.6L/min of with an isoflurane induction chamber.
- 225 3. Take out the mouse from the isoflurane induction chamber, put the mouse prone into  
226 the surgery tray, and put the snout (nose and mouth) into the isoflurane mask. The surgery  
227 bed is over a heating pad to avoid hypothermia during the procedure. Reduce the isoflurane  
228 concentration to 2% (vol/vol).
- 229 4. Add ophthalmic drops in the eyes to avoid corneal drying.
- 230 5. Turn the mouse to supine position.
- 231 6. Check anesthetic depth by non-response to hind limb toe pinch.
- 232 7. Using small pieces of masking tape, fix the limbs of the mice to the surgery bed.

- 233 8. Dampen the hair of the abdominal area with 70% ethanol either by spraying or by  
234 dipping. Clean with a paper towel. Let it dry.
- 235 9. With a disposable razor, shave the abdominal zone.
- 236 10. Clean the shaved abdominal zone with povidone-iodine and clean it with towel paper  
237 (Fig 2A).

238

239 **Fig 2. Schematic identification of linea alba.** (A) The abdominal skin of the  
240 anesthetized mouse was disinfected with 70% ethanol, then was shaved, and the  
241 skin was cleaned with povidone-iodine. (B) The incision in the skin was performed  
242 parallel to the linea alba. (C) Identification of the linea alba as a semitransparent  
243 white line in the peritoneum.

244

245 For steps 1–10, see [S1 Video](#).

246

- 247 11. Using forceps and a surgical scissor sharp/blunt, perform an incision of ~2cm in the  
248 midline of the abdominal skin (Fig 2B).
- 249 12. The skin is separated from the peritoneum using anatomical forceps.
- 250 13. Identify the linea alba, a semitransparent longitudinally white line in the peritoneum  
251 (Fig 2C).
- 252 14. Open the abdominal cavity, incise the abdominal musculature on the linea alba. For  
253 this, gently grab the musculature with anatomical forceps and retracting up. The abdominal  
254 organs are not adjacent to the muscles. Using a scissor or a scalpel makes a small opening  
255 into the peritoneal cavity in the linea alba. Extend the incision in the midline until it reaches  
256 the size of the skin cut.

257

258 For steps 11–14, see [S2 Video](#).

259

260 15. Using forceps, gently move the intestines to identify the cecum, a large J-shaped blind  
261 sac curved. Extract the cecum through the incision and identify the ileum and colon ([Fig 3A](#)).

262 The ileum is the distal last part of the small intestine that is attached to the cavity by  
263 mesentery tissue that derives blood supply from the mesenteric artery [21]. The proximal  
264 colon is the first part of the colon that begins in the cecum.

265

266 **Fig 3. Identification of regions of interest to perform ligations between blood**  
267 **vessels.** (A) Identification of ileum and colon using as reference the cecum. The  
268 regions of interest to be ligated are indicated with dotted lines. The yellow line and  
269 blue line denote the first and second ligation, respectively. Ligations are spaced  
270 ~1.5 cm. The ligatures with surgical silk sutures were performed between the  
271 intestine and the blood vessels. The identification of regions of interest are shown  
272 in (B) ileum and (C) proximal colon. As a reference, the first ligation was performed  
273 close to the cecum.

274

275 16. When the ileum or colon has fecal material, it can be removed, pressing gently with  
276 a blunt tip of the forceps against your fingers and move it in the direction of the flow of the  
277 fecal material or to the cecum.

278 17. In the ileum, identify regions to be ligated where blood vessels are finely separated  
279 from the ileum's external wall ([Fig 3B](#)). Once identified, pass the fine tip of the forceps  
280 Dumont N° 5 between the outer wall of the ileum and the blood vessels having care of not

281 damage or puncture the blood vessels. With the tip of the forceps Domont N° 5, on the other  
282 side of the hole formed between the external wall of the ileum and the blood vessels, grasp  
283 the thread of the surgical suture, and gently pass to the other side of the hole.

284 18. Perform a firm but gentle double "simple knot," performing a blind knot so as not to  
285 cut the tissue and having special care of not ligate neither interfering with the blood flow.

286 **Note:** When necessary, hydrate the intestines with drops of sterile saline solution.

287 19. A second ligation is then performed at ~1.5cm of distance from the first ligation using  
288 the same strategy described above ([Fig 3B](#)). However, in this case, perform a simple knot  
289 without closing.

290 20. At 0.5–1cm out of the second ligation, insert the syringe needle of a tuberculin syringe  
291 with  $5 \times 10^8$  *C. difficile* spores in 100µL of saline in the direction of the ligation and cross the  
292 ligation by inside the intestine the and close the knot with the syringe needle inside. *C.*  
293 *difficile* spores strain R20291 (CM210) were purified as was described previously [22].

294 21. Release the *C. difficile* spores inside the loop, keeping the pressure in the knot. This  
295 is performed to avoid inoculum loss and splashing that occurs when the ligated loop is  
296 injected directly.

297 22. Remove the syringe and close the ligation with a simple double knot.

298

299 For steps 15–22, see [S3 Video](#).

300

301 23. To perform the colonic loop, identify the regions to be ligated ([Fig 3C](#)) and repeat the  
302 points 15–22 in the proximal colon.

303 24. Carefully using anatomical forceps return intestines to the abdominal cavity.

304

305 For steps 23 and 24, see [S3 Video](#).

306

307 25. Close the peritoneum of the abdominal wall by a continuous or interrupted suture  
308 using silk suture.

309 26. Close the skin of the abdominal wall by continuous or interrupted suture using silk  
310 suture.

311 27. Remove mice from the isoflurane mask and from the heating pad and allow the mouse  
312 to recover from the anesthesia under a heat lamp. The awareness recovery usually takes 1–  
313 2min.

314

315 For steps 25–27, see [S4 Video](#).

316

317 28. Apply postoperative analgesia when required according to the animal care protocol  
318 at your institution.

319 Usually, the complete procedure for one mouse and one loop takes ~15 min: and with  
320 2 loops ~10min.

321

322 Animals were kept in the cage for 5h with free access to water and close to a heat  
323 lamp. Animals were monitored every 30 min.

324

### 325 **Necropsy and tissue collecting.**

326 29. Depth anesthesia is induced by isoflurane inhalation, as is indicated above in step 2.

327 30. Check anesthetic depth by non-response to hind limb toe pinch.

328 31. Perform cervical dislocation by separating the vertebrae in the cervical area with a  
329 firm pinch to the neck using a rigid metallic tool and firmly pull the mouse from the tail. The  
330 separation of the skull and brain from the spinal cord is caused by anterior pressure applied  
331 in the skull base.

332 32. Using forceps, gently grab the skin and retract it up, so the abdominal organs and the  
333 ligated loops are not adjacent to the muscles.

334 33. Using scissors, open the abdominal cavity, cutting the skin and peritoneum. Extend  
335 the incision to visualize the intestines and the loops.

336 34. Remove the ligated ileum and colonic loop by cutting at ~0.5mm from the outside of  
337 ligatures and put the intestinal loops in a petri dish.

338

339 For steps 33–34, see [S5 Video](#).

340

#### 341 **Fixing the tissues.**

342 35. In a biosafety cabinet, put drops of 1mL of PBS over a petri dish.

343 36. To fix the tissues, prepare a "fixation chamber": we used a petri dish, but you can use  
344 any other tupperware with lid that you have available. Put inside a filter paper (extra thick  
345 blot paper). If the filter paper is larger than the used container, cut the filter paper with  
346 scissors o fit it inside the container.

347 37. Imbibe filter paper with the solution of 30% sucrose in PBS–4% paraformaldehyde  
348 enough to wet the entire filter paper without adding an excess of solution. Remove the excess  
349 of fixing solution from one edge using a 100–1000 $\mu$ L micropipette.



350 38. To remove the ligatures, cut the ligated loop as close as possible from the ligation. A  
351 liquid with gelatinous consistency comes out of it. Be careful with the handling because that  
352 liquid has a high concentration of *C. difficile* spores.

353 39. Put the scissor tip inside the lumen of the intestine and perform a longitudinal cut in  
354 the tissue to extend it.

355 40. Grasp the tissue from one end with the forceps and wash the tissue by immersion in  
356 the PBS drops for ~20 immersions and repeat in 2–3 different drops of fresh PBS as is  
357 necessary for each tissue.

358 41. With anatomical forceps, grasp the opened intestinal tissues from a corner with the  
359 muscular layer downwards and the luminal side upwards. This can be identified because  
360 when the longitudinally cut tissue is grasped with the forceps from one end, it tends to recover  
361 its uncut shape, where the luminal side is inwards and the muscular side is outside. Using 2  
362 pairs of forceps, stretch the tissues on the filter paper with the fixing solution.

363 42. Using a 100–1000 $\mu$ L micropipette, add fixing solution directly over the tissues.  
364 Repeat each ~5min.

365 43. Let samples fixing for at least 15 min.

366 44. Using forceps, transfers each tissue to one independent 1.5mL microcentrifuge tube  
367 containing 1mL of 30% sucrose in PBS–4% paraformaldehyde solution, having care that the  
368 tissue is completely submerged in the fixing solution and there are no air bubbles in the tissue.

369 Is common that some tissues should be folded in half so that it remains immersed in the  
370 solution. If the intestine has adipose tissue attached, it will tend to float. Therefore, it is  
371 recommended to remove the adipose tissue using scissors and forceps. Incubate the intestines  
372 in fixing solution overnight at 4° C.

373

374 For steps 36–44, see [S6 Video](#).

375

## 376 **Immunofluorescence**

### 377 Day 2

378 45. Using forceps, transfer the tissues to a new 1.5mL microcentrifuge tube containing  
379 1mL of PBS. Perform this step carefully to avoid paraformaldehyde splashing. Incubate for  
380 ~5 min at RT.

381 46. Wash the tissues. Using a 100–1000 $\mu$ L micropipette, remove the PBS and discard it  
382 to an autoclavable glass bottle, from now on, waste bottle. Add 1.0mL of PBS to the edges  
383 of the tube. And repeat one more time.

384 47. Using forceps put the tissues over a clean and sterile open petri dish, and using  
385 surgical scissors, cut a section of the tissues of ~5mm  $\times$  5mm.

386 48. Using forceps, transfer the tissues to a 0.5mL microcentrifuge tube containing 150 $\mu$ L  
387 permeabilizing solution; PBS–0.2% Triton X-100 and incubated for 2h at RT.

388 49. Using a 20–200 $\mu$ L micropipette, remove the permeabilizing solution as much as  
389 possible from the walls of the tube and discard it in the waste bottle. Add 200 $\mu$ L of PBS to  
390 wash the samples and incubate for ~3 min at RT in an orbital shaker at 60 RPM. Repeat 2  
391 more times.

392 50. In the same tubes, incubate the tissues with 150 $\mu$ L of blocking solution; PBS–3%  
393 BSA for 3h at RT in an orbital shaker at 60RPM.

394 51. Using a 20–200 $\mu$ L micropipette, remove the blocking solution and discard it in the  
395 waste bottle.

396 52. Add 70–90 $\mu$ L of 1:1,000 chicken primary antibody anti-*C. difficile* spore IgY batch  
397 7246 (AvesLab, USA) and 1:150 phalloidin Alexa-Fluor 568 (A12380 Invitrogen, USA); in

398 PBS–3% BSA overnight at 4° C. This antibody does not immunoreacted with epitopes of  
399 vegetative cells neither with murine microbiota [20, 23]. After adding the antibody solution,  
400 check that there are no bubbles in the tube and that the tissue is completely submerged.

401

402 Day 3

403 53. Wash the tissues. Using a 20–200 µL micropipette, remove the primary antibody  
404 solution as much as possible from the walls of the tube and discard it in the waste bottle. Add  
405 200µL of PBS to wash the samples and incubate for ~3 min at RT in an orbital shaker at  
406 60RPM. Repeat 2 more times.

407 54. In the same tube, incubate the tissue with 70–90 µL of 1:350 secondary antibodies  
408 goat anti-chicken IgY Alexa Fluor-647 (ab150175, Abcam, USA) and 4.5µg/mL of Hoechst  
409 33342 (ThermoFisher, USA) and incubate for 3h at RT in an orbital shaker at 60RPM.

410 55. Wash the tissues 3 times as was described in step 53.

411

## 412 **Sample mounting**

413 At this point is difficult to identify the luminal side and the muscular side of the tissues  
414 at the naked eye. However, sample mounting is essential to identify the tissue orientation.

415 For this:

416 56. Using forceps, place the samples in a clean glass slide.

417 57. First, using a light -upright or -inverted microscope with 20× or 40× magnification  
418 coupled to epifluorescence with a blue filter to visualize Hoechst 33342 staining, orientate  
419 the tissues to put the liminal side up as follow.

- 420 a. In the case of the ileum, villi can be visualized, and in the case of the colon,  
421 crypts are easy to identify. In both cases, on the other side, the muscular layer  
422 is seen.
- 423 b. **Note 1:** if you are using upright microscopy, when you see the crypts or villi,  
424 keep the orientation of the tissue to the glass slide. If you use an inverted  
425 microscope, when you see crypts or villi, flip the tissue to the other side and  
426 put them in the glass slides. (Fig 4A and B).
- 427 c. **Note 2:** During this process, don't let the tissues dry because it causes  
428 autofluorescence. If samples begin to dry, add PBS with a micropipette.

429

430 **Fig 4. Tissue orientation under microscopy for mounting.** Immunostained tissues  
431 were visualized under an upright light/epifluorescence microscopy to identify the  
432 tissue orientation to mount them with the luminal side up. Representative phase-  
433 contrast and Hoechst staining micrograph of (A) ileum and (B) proximal colon with  
434 the luminal or muscular side up. Scale bar 400 $\mu$ m.

435

- 436 58. Clean the coverslips and slides with 70% ethanol and towel paper.
- 437 59. Using towel paper removes the excess PBS from the edges of the tissues.
- 438 60. In a new clean glass slide, using a 2–20 $\mu$ L micropipette, put a drop of 5 $\mu$ L of  
439 fluorescent mounting medium for each tissue to be mounted.
- 440 61. Using forceps put the tissues over the drops of the mounting medium of the clean  
441 slide.
- 442 62. Using a 2–20 $\mu$ L micropipette, put 15 $\mu$ L of fluorescent mounting medium over the  
443 tissues having care of not to damage the tissue with the tip of the micropipette.

- 444 63. Put Scotch transparent tape (3M, USA) on the upper and lower edges of the coverslip,  
445 leaving half of the Scotch transparent tape on the coverslips and the other half free.
- 446 64. Put a coverslip over the samples, not allowing air bubbles to remain in the tissue.
- 447 65. With your fingers, fold the piece of Scotch transparent tape under the slide firmly.
- 448 66. Seal the remaining edges with Scotch transparent tape.
- 449 67. Store the samples at 4° C overnight, and then the samples are ready to visualize under  
450 confocal microscopy.
- 451 a. Note: After mounting, we usually observe the samples as soon as possible and  
452 with no more than 1 week because sometimes samples begin to dry, making  
453 impossible the confocal visualization. If you need to store the samples for a  
454 longer time, you can store them in a wet chamber: in a tupperware with lid,  
455 put a layer of towel paper on the bottom and wet it with water (not in excess),  
456 then put a layer of parafilm or plastic wrap, and over it, you can put the  
457 samples and then close the cage.

458

459 For steps 57–67, see [S7 Video](#).

460

## 461 **Confocal Microscopy**

462 The confocal microscope Leica SP8 (Leica, Germany) of the Confocal Microscopy  
463 Core Facility of the Universidad Andrés Bello was used to acquire images. To evaluate spore  
464 adherence and internalization in the mice intestinal mucosa, images were acquired using the  
465 objective HPL APO CS2 40× oil, numerical aperture 1.30. For signals detection, three  
466 photomultipliers (PMT) spectral detectors were used; PMT1 (410–483) DAPI, PMT2 (505–  
467 550), Alexa-Fluor 488, and PMT3 (587–726) Alexa-Fluor 555. Emitted fluorescence was

468 split with dichroic mirrors DD488/552. Images of  $1,024 \times 1,024$  pixels were acquired with  
469  $0.7\text{-}\mu\text{m}$   $z$ -step size. Representative images were represented by three-dimensional (3D)  
470 reconstructions of intestinal epithelium using the plug-in 3D Projection of ImageJ software  
471 (NIH, USA). Villi and crypts were visualized by Hoechst and phalloidin signals.

472

### 473 **Quantification of spore adherence and internalization in the intestinal mucosa.**

474 Confocal images were analyzed using ImageJ. In the first place, we analyzed the spore  
475 adherence in the ileum mucosa in mice of 7-weeks-old, 1-, and 2-years-old. Representative  
476 images are shown in [Fig 5A](#). Adhered spores were considered fluorescent spots in narrow  
477 contact with the actin cytoskeleton (visualized with F-actin). Adhered *C. difficile* spores were  
478 counted one-by-one using the plug-in Cell Counter or Point Tool of ImageJ. We observed  
479 that spore adherence varies between animals of each group and decreases according to  
480 increases the aging. The average spore adherence was  $\sim 610$ ,  $\sim 571$ , and  $\sim 427$  spores, every  
481  $10^5 \mu\text{m}^2$  in the ileum of mice with 7-weeks, 1-, and 2-years-old, respectively, with no  
482 significant differences between the groups ([Fig 5B](#)). We identified internalized spores using  
483 the plug-in Orthogonal View of ImageJ. Internalized spores were considered fluorescent  
484 spots inside the actin cytoskeleton in the three spatial planes (XY, XZ, YZ) [20, 24] ([Fig 5A](#)  
485 see magnifications XY and XZ). We observed that the spore internalization was on average  
486 of  $\sim 0.5\%$ ,  $\sim 0.3\%$ , and  $\sim 2.1\%$  of the total spores in mice of 7 weeks old, 1- or 2 -year-old  
487 respectively, with a tendency to increase the spore entry in mice of 2-years-old compared to  
488 mice of 7-weeks-old ([Fig 5C](#)).

489

490 **Fig 5. Visualization and quantification of adhered and internalized *C. difficile***  
491 **spores in the ileum and colonic mucosa during aging.** Representative confocal

492 micrographs of (A) ileum and (D) colonic mucosa of the ligated loop. *C. difficile*  
493 spores are shown in green, F-actin in grey, and nuclei in blue (fluorophores colors  
494 were digitally reassigned for a better representation). The white arrow and empty  
495 arrow denote internalized and adhered *C. difficile* spores, respectively. Quantification  
496 of (B) adhered spots (spores) per  $10^5 \mu\text{m}^2$  and (C) percentage of internalized spots in  
497 the ileum or (E, F) colonic mucosa. Error bars indicate the average  $\pm$  SEM. Scale bar,  
498 20  $\mu\text{m}$ . Statistical analysis was performed by two-tailed Mann–Whitney test; post-  
499 Dunn’s; test; ns,  $p > 0.05$ .

500

501 Using the same strategy, we analyzed spore adherence to the colonic mucosa.  
502 Representative images are shown in Fig 5D. We observed a decrease in spore adherence  
503 according to the aging increase. The spore adherence was on average of  $\sim 713$ , 520, and 527  
504 spores, every  $10^5 \mu\text{m}^2$  in the tissue of mice with 7-weeks-old, 1-year-old, and 2-years-old,  
505 respectively (Fig 5E). Then we observed that on average the 0.36, 0.05, and 0.81% of the  
506 total spores were internalized in the colonic mucosa, and we observed an increase in the spore  
507 internalization of mice of 2-years-old compared to mice of 1-year-old ( $p = 0.0571$ ; Fig 5D  
508 magnifications XY and XZ and Fig 5F). Altogether, those data suggest that *C. difficile* spore  
509 adherence decreases according to increase aging, but the spore internalization increases in 2-  
510 years-old mice in both ileum and colonic mucosa.

511

## 512 DISCUSSION

513 The intestinal ligated loop technique was described to our knowledge for the first time  
514 in 1953 in rabbits, [25], and since then has been widely used in several animal species such  
515 as rabbit [26-29], mouse, [30], rat [31], chicken [32] and pig [33] to study pathogenesis and  
516 the interaction with the host of bacteria such as *Clostridium perfringens* [34], *Vibrio cholerae*  
517 [35], *Listeria monocytogenes* [36], and *C. difficile* toxins TcdA and TcdB [26-29]. However,  
518 there is not a step-by-step protocol describing this technique coupled to confocal imaging to  
519 study the interaction of *C. difficile* with the intestinal mucosa.

520

521 In this work, we described a highly detailed protocol of a surgical procedure of  
522 intestinal ligated loop technique, including animal, anesthetize, opening the peritoneal  
523 cavities, perform the ligated intestinal loop, the inoculation with *C. difficile* spores, close the  
524 skin and peritoneum wall, monitoring the recovery of the mice, perform immunofluorescence  
525 of whole-mounted tissue against *C. difficile* spores, and staining of F-actin and nuclei,  
526 mounting of the sample, visualization of the sample by confocal microscopy, and finally the  
527 quantification of spore adherence and internalization in the ileum and colonic mucosa.

528

529 Using the intestinal ligated loop technique, here, we described that adherence of *C.*  
530 *difficile* spores to the ileum, and colonic mucosa is decreased in mice of 1-years-old and 2-  
531 years-old compared to 7-weeks-old mice. Also, that *C. difficile* spore entry is increased in 2-  
532 year-old mice. This finding, coupled with our recent observations that *C. difficile* spore entry  
533 is associated with R-CDI rates [20], may explain the increased R-CDI rates observed in  
534 elderly patients and in animal models [5, 6, 37].



535           During aging, several physiological changes occur in the intestinal mucosa that could  
536 affect spore adherence and internalization. In mice, it has been reported that a reduction of  
537 about 6-fold in the thickness of the colonic mucus layer in older mice compared to young  
538 mice [38], which enables a direct contact of bacteria with the intestinal epithelium and an  
539 increased bacteria penetration [38, 39]. Additionally, in human biopsies of older adults have  
540 been observed an increased intestinal permeability by a reduced transepithelial electric  
541 resistance compared to young humans [40] being those changes in the permeability to ions  
542 and not for macromolecules [41]. Recently we demonstrated that *C. difficile* spores gain  
543 access into the intestinal epithelial cells via pathways dependent on fibronectin- $\alpha_5\beta_1$  and  
544 vitronectin- $\alpha_v\beta_1$  [20]. Although fibronectin, vitronectin, and integrins  $\alpha_5$ ,  $\alpha_v$ , and  $\beta_1$  are mainly  
545 located in the basolateral membrane [42, 43] we have shown that fibronectin and vitronectin  
546 are lumenally accessible into the colonic mucosa of healthy young mice [20]. To date,  
547 whether these molecules are increased and/or become lumenally accessible in aged intestines  
548 due to the reduced intestinal permeability and whether this contributes to spore adherence  
549 and entry to the intestinal mucosa remains to be elucidated.

550           We also recently shown that nystatin reduces the *C. difficile* spore entry *in vitro* and  
551 in the ileum but not into the colonic mucosa [20]. Nystatin is a cholesterol-chelating agent  
552 that disrupts cholesterol lipid raft required entry of pathogens dependent on caveolin and  
553 integrin [44, 45], suggesting that caveolin may be involved in *C. difficile* spore  
554 internalization. Results of this work showing that *C. difficile* spore internalization is increased  
555 with aging. Consequently, with this, had been reported that senescent cells had increased  
556 levels of caveolin-1, associated with higher rates of bacterial infection. For example,  
557 *Salmonella typhimurium* entry into senescent host cells that over-expressing caveolin-1 is  
558 increased compared with non-senescent cells, and the bacterial entry, depends on the levels

559 of caveolin-1 expression [46]. However, those unknown changes in the aged intestinal  
560 mucosa, coupled with a reduced mucus thickness, could explain the increased *C. difficile*  
561 spore entry observed in the intestinal mucosa of older mice.

562

563

564 **Conflict of interest**

565 The authors declare that they have no conflict of interest.

566

567 **Acknowledgments**

568 The authors acknowledge to Nicolás Montes-Bravo for the help and dedication taking  
569 photographs and recording the videos shown in this work.

570

571 **Founding**

572 This work was funded by FONDECYT Regular 1191601, 1151025, and by Millennium  
573 Science Initiative Program - NCN17\_093, and Startup funds from the Department of Biology  
574 at Texas A&M University to D.P-S. Additional funding support to P.C-C from ANID-  
575 PCHA/Doctorado Nacional/2016-21161395. We certify that funding sources had no  
576 implication in the study design, data collection, analysis, and interpretation of data.

577

## 578 References

- 579 1. Evans CT, Safdar N. Current Trends in the Epidemiology and Outcomes of  
580 *Clostridium difficile* Infection. Clin Infect Dis. 2015;60 Suppl 2:S66-71. doi:  
581 10.1093/cid/civ140. PubMed PMID: 25922403.
- 582 2. Ramsay I, Brown NM, Enoch DA. Recent Progress for the Effective Prevention and  
583 Treatment of Recurrent *Clostridium difficile* Infection. Infect Dis (Auckl).  
584 2018;11:1178633718758023. Epub 2018/03/15. doi: 10.1177/1178633718758023. PubMed  
585 PMID: 29535530; PubMed Central PMCID: PMC5844436.
- 586 3. Poutanen SM, Simor AE. *Clostridium difficile*-associated diarrhea in adults. CMAJ.  
587 2004;171(1):51-8. doi: 10.1503/cmaj.1031189. PubMed PMID: 15238498; PubMed Central  
588 PMCID: PMC437686.
- 589 4. Redelings MD, Sorvillo F, Mascola L. Increase in *Clostridium difficile*-related  
590 mortality rates, United States, 1999-2004. Emerg Infect Dis. 2007;13(9):1417-9. doi:  
591 10.3201/eid1309.061116. PubMed PMID: 18252127; PubMed Central PMCID:  
592 PMC2857309.
- 593 5. Stevens VW, Nelson RE, Schwab-Daugherty EM, Khader K, Jones MM, Brown KA,  
594 et al. Comparative Effectiveness of Vancomycin and Metronidazole for the Prevention of  
595 Recurrence and Death in Patients With *Clostridium difficile* Infection. JAMA Intern Med.  
596 2017;177(4):546-53. doi: 10.1001/jamainternmed.2016.9045. PubMed PMID: 28166328.
- 597 6. Di X, Bai N, Zhang X, Liu B, Ni W, Wang J, et al. A meta-analysis of metronidazole  
598 and vancomycin for the treatment of *Clostridium difficile* infection, stratified by disease  
599 severity. Braz J Infect Dis. 2015;19(4):339-49. Epub 2015/05/19. doi:  
600 10.1016/j.bjid.2015.03.006. PubMed PMID: 26001980.
- 601 7. Johnson S. Recurrent *Clostridium difficile* infection: a review of risk factors,  
602 treatments, and outcomes. J Infect. 2009;58(6):403-10. Epub 2009/04/05. doi:  
603 10.1016/j.jinf.2009.03.010. PubMed PMID: 19394704.
- 604 8. Abou Chakra CN, Pepin J, Sirard S, Valiquette L. Risk factors for recurrence,  
605 complications and mortality in *Clostridium difficile* infection: a systematic review. PLoS  
606 One. 2014;9(6):e98400. Epub 2014/06/04. doi: 10.1371/journal.pone.0098400. PubMed  
607 PMID: 24897375; PubMed Central PMCID: PMC4045753.
- 608 9. Jump RL. *Clostridium difficile* infection in older adults. Aging health. 2013;9(4):403-  
609 14. doi: 10.2217/ahe.13.37. PubMed PMID: 24955106; PubMed Central PMCID:  
610 PMC4061705.
- 611 10. Frasca D, Blomberg BB. Inflammaging decreases adaptive and innate immune  
612 responses in mice and humans. Biogerontology. 2016;17(1):7-19. Epub 2015/04/29. doi:  
613 10.1007/s10522-015-9578-8. PubMed PMID: 25921609; PubMed Central PMCID:  
614 PMC4626429.
- 615 11. Sapey E, Greenwood H, Walton G, Mann E, Love A, Aaronson N, et al.  
616 Phosphoinositide 3-kinase inhibition restores neutrophil accuracy in the elderly: toward  
617 targeted treatments for immunosenescence. Blood. 2014;123(2):239-48. Epub 2013/11/04.  
618 doi: 10.1182/blood-2013-08-519520. PubMed PMID: 24191150; PubMed Central PMCID:  
619 PMC3888290.
- 620 12. Wenisch C, Patruta S, Daxböck F, Krause R, Hörl W. Effect of age on human  
621 neutrophil function. J Leukoc Biol. 2000;67(1):40-5. doi: 10.1002/jlb.67.1.40. PubMed  
622 PMID: 10647996.

- 623 13. De Maeyer RPH, Chambers ES. The impact of ageing on monocytes and  
624 macrophages. *Immunol Lett.* 2021;230:1-10. Epub 2020/12/10. doi:  
625 10.1016/j.imlet.2020.12.003. PubMed PMID: 33309673.
- 626 14. Pinti M, Appay V, Campisi J, Frasca D, Fülöp T, Sauce D, et al. Aging of the immune  
627 system: Focus on inflammation and vaccination. *Eur J Immunol.* 2016;46(10):2286-301. doi:  
628 10.1002/eji.201546178. PubMed PMID: 27595500; PubMed Central PMCID:  
629 PMCPMC5156481.
- 630 15. Ragonnaud E, Biragyn A. Gut microbiota as the key controllers of "healthy" aging of  
631 elderly people. *Immun Ageing.* 2021;18(1):2. Epub 2021/01/05. doi: 10.1186/s12979-020-  
632 00213-w. PubMed PMID: 33397404; PubMed Central PMCID: PMCPMC7784378.
- 633 16. Xu C, Zhu H, Qiu P. Correction to: Aging progression of human gut microbiota. *BMC*  
634 *Microbiol.* 2021;21(1):129. Epub 2021/04/28. doi: 10.1186/s12866-021-02200-7. PubMed  
635 PMID: 33910508; PubMed Central PMCID: PMCPMC8080400.
- 636 17. Borriello SP, Barclay FE. An in-vitro model of colonisation resistance to *Clostridium*  
637 *difficile* infection. *J Med Microbiol.* 1986;21(4):299-309. doi: 10.1099/00222615-21-4-299.  
638 PubMed PMID: 3723582.
- 639 18. Shin JH, Gao Y, Moore JH, Bolick DT, Kolling GL, Wu M, et al. Innate Immune  
640 Response and Outcome of *Clostridium difficile* Infection Are Dependent on Fecal Bacterial  
641 Composition in the Aged Host. *J Infect Dis.* 2018;217(2):188-97. doi: 10.1093/infdis/jix414.  
642 PubMed PMID: 28968660; PubMed Central PMCID: PMCPMC5853981.
- 643 19. Deakin LJ, Clare S, Fagan RP, Dawson LF, Pickard DJ, West MR, et al. The  
644 *Clostridium difficile* spo0A gene is a persistence and transmission factor. *Infect Immun.*  
645 2012;80(8):2704-11. Epub 2012/05/21. doi: 10.1128/IAI.00147-12. PubMed PMID:  
646 22615253; PubMed Central PMCID: PMCPMC3434595.
- 647 20. Castro-Córdova P, Mora-Urbe P, Reyes-Ramírez R, Cofré-Araneda G, Orozco-  
648 Aguilar J, Brito-Silva C, et al. Entry of spores into intestinal epithelial cells contributes to  
649 recurrence of *Clostridioides difficile* infection. *Nat Commun.* 2021;12(1):1140. Epub  
650 2021/02/18. doi: 10.1038/s41467-021-21355-5. PubMed PMID: 33602902.
- 651 21. Treuting PM, Arends MJ, Dintzis SM. *Comparative Anatomy and Histology (Second*  
652 *Edition)*: Academic Press; 2018.
- 653 22. Calderón-Romero P, Castro-Córdova P, Reyes-Ramírez R, Milano-Céspedes M,  
654 Guerrero-Araya E, Pizarro-Guajardo M, et al. *Clostridium difficile* exosporium cysteine-rich  
655 proteins are essential for the morphogenesis of the exosporium layer, spore resistance, and  
656 affect *C. difficile* pathogenesis. *PLoS Pathog.* 2018;14(8):e1007199. Epub 2018/08/08. doi:  
657 10.1371/journal.ppat.1007199. PubMed PMID: 30089172; PubMed Central PMCID:  
658 PMCPMC6101409.
- 659 23. Pizarro-Guajardo M, Díaz-González F, Álvarez-Lobos M, Paredes-Sabja D.  
660 Characterization of Chicken IgY Specific to *Clostridium difficile* R20291 Spores and the  
661 Effect of Oral Administration in Mouse Models of Initiation and Recurrent Disease. *Front*  
662 *Cell Infect Microbiol.* 2017;7:365. Epub 2017/09/01. doi: 10.3389/fcimb.2017.00365.  
663 PubMed PMID: 28856119; PubMed Central PMCID: PMCPMC5557795.
- 664 24. Lee SM, Donaldson GP, Mikulski Z, Boyajian S, Ley K, Mazmanian SK. Bacterial  
665 colonization factors control specificity and stability of the gut microbiota. *Nature.*  
666 2013;501(7467):426-9. Epub 2013/08/18. doi: 10.1038/nature12447. PubMed PMID:  
667 23955152; PubMed Central PMCID: PMCPMC3893107.

- 668 25. De SN, Chatterje DN. An experimental study of the mechanism of action of *Vibrio*  
669 *cholerae* on the intestinal mucous membrane. J Pathol Bacteriol. 1953;66(2):559-62. doi:  
670 10.1002/path.1700660228. PubMed PMID: 13118463.
- 671 26. Gilbert RJ, Triadafilopoulos G, Pothoulakis C, Giampaolo C, LaMont JT. Effect of  
672 purified *Clostridium difficile* toxins on intestinal smooth muscle. I. Toxin A. Am J Physiol.  
673 1989;256(4 Pt 1):G759-66. doi: 10.1152/ajpgi.1989.256.4.G759. PubMed PMID: 2495733.
- 674 27. Gilbert RJ, Pothoulakis C, LaMont JT. Effect of purified *Clostridium difficile* toxins  
675 on intestinal smooth muscle. II. Toxin B. Am J Physiol. 1989;256(4 Pt 1):G767-72. doi:  
676 10.1152/ajpgi.1989.256.4.G767. PubMed PMID: 2495734.
- 677 28. Triadafilopoulos G, Pothoulakis C, O'Brien MJ, LaMont JT. Differential effects of  
678 *Clostridium difficile* toxins A and B on rabbit ileum. Gastroenterology. 1987;93(2):273-9.  
679 doi: 10.1016/0016-5085(87)91014-6. PubMed PMID: 3596162.
- 680 29. Mitchell TJ, Ketley JM, Haslam SC, Stephen J, Burdon DW, Candy DC, et al. Effect  
681 of toxin A and B of *Clostridium difficile* on rabbit ileum and colon. Gut. 1986;27(1):78-85.  
682 doi: 10.1136/gut.27.1.78. PubMed PMID: 3949240; PubMed Central PMCID:  
683 PMCPMC1433160.
- 684 30. Koon HW, Ho S, Hing TC, Cheng M, Chen X, Ichikawa Y, et al. Fidaxomicin inhibits  
685 *Clostridium difficile* toxin A-mediated enteritis in the mouse ileum. Antimicrob Agents  
686 Chemother. 2014;58(8):4642-50. Epub 2014/06/02. doi: 10.1128/AAC.02783-14. PubMed  
687 PMID: 24890583; PubMed Central PMCID: PMCPMC4135997.
- 688 31. Pothoulakis C, Kelly CP, Joshi MA, Gao N, O'Keane CJ, Castagliuolo I, et al.  
689 *Saccharomyces boulardii* inhibits *Clostridium difficile* toxin A binding and enterotoxicity in  
690 rat ileum. Gastroenterology. 1993;104(4):1108-15. doi: 10.1016/0016-5085(93)90280-p.  
691 PubMed PMID: 8462799.
- 692 32. Parent E, Burns P, Desrochers A, Boulianne M. A Ligated Intestinal Loop Model in  
693 Anesthetized Specific Pathogen Free Chickens to Study *Clostridium Perfringens* Virulence.  
694 J Vis Exp. 2018;(140). Epub 2018/10/11. doi: 10.3791/57523. PubMed PMID: 30371671;  
695 PubMed Central PMCID: PMCPMC6235459.
- 696 33. Scaria J, Janvilisri T, Fubini S, Glead RD, McDonough SP, Chang YF. *Clostridium*  
697 *difficile* transcriptome analysis using pig ligated loop model reveals modulation of pathways  
698 not modulated in vitro. J Infect Dis. 2011;203(11):1613-20. doi: 10.1093/infdis/jir112.  
699 PubMed PMID: 21592991; PubMed Central PMCID: PMCPMC3096783.
- 700 34. Duncan CL, Sugiyama H, Strong DH. Rabbit ileal loop response to strains of  
701 *Clostridium perfringens*. J Bacteriol. 1968;95(5):1560-6. doi: 10.1128/JB.95.5.1560-  
702 1566.1968. PubMed PMID: 4297020; PubMed Central PMCID: PMCPMC252176.
- 703 35. Jenkin CR, Rowley D. Possible factors in the pathogenesis of cholera. Br J Exp  
704 Pathol. 1959;40:474-81. PubMed PMID: 14407057; PubMed Central PMCID:  
705 PMCPMC2082309.
- 706 36. Pron B, Boumaila C, Jaubert F, Sarnacki S, Monnet JP, Berche P, et al.  
707 Comprehensive study of the intestinal stage of listeriosis in a rat ligated ileal loop system.  
708 Infect Immun. 1998;66(2):747-55. doi: 10.1128/IAI.66.2.747-755.1998. PubMed PMID:  
709 9453636; PubMed Central PMCID: PMCPMC107965.
- 710 37. van Opstal E, Kolling GL, Moore JH, Coquery CM, Wade NS, Loo WM, et al.  
711 Vancomycin Treatment Alters Humoral Immunity and Intestinal Microbiota in an Aged  
712 Mouse Model of *Clostridium difficile* Infection. J Infect Dis. 2016;214(1):130-9. Epub  
713 2016/02/24. doi: 10.1093/infdis/jiw071. PubMed PMID: 26917573; PubMed Central  
714 PMCID: PMCPMC4907406.

- 715 38. Sovran B, Hugenholtz F, Elderman M, Van Beek AA, Graversen K, Huijskes M, et  
716 al. Age-associated Impairment of the Mucus Barrier Function is Associated with Profound  
717 Changes in Microbiota and Immunity. *Sci Rep.* 2019;9(1):1437. Epub 2019/02/05. doi:  
718 10.1038/s41598-018-35228-3. PubMed PMID: 30723224; PubMed Central PMCID:  
719 PMCPMC6363726.
- 720 39. Elderman M, Sovran B, Hugenholtz F, Graversen K, Huijskes M, Houtsma E, et al.  
721 The effect of age on the intestinal mucus thickness, microbiota composition and immunity in  
722 relation to sex in mice. *PLoS One.* 2017;12(9):e0184274. Epub 2017/09/12. doi:  
723 10.1371/journal.pone.0184274. PubMed PMID: 28898292; PubMed Central PMCID:  
724 PMCPMC5595324.
- 725 40. Man AL, Bertelli E, Rentini S, Regoli M, Briars G, Marini M, et al. Age-associated  
726 modifications of intestinal permeability and innate immunity in human small intestine. *Clin  
727 Sci (Lond).* 2015;129(7):515-27. Epub 2015/05/07. doi: 10.1042/CS20150046. PubMed  
728 PMID: 25948052.
- 729 41. Qi Y, Goel R, Kim S, Richards EM, Carter CS, Pepine CJ, et al. Intestinal  
730 Permeability Biomarker Zonulin is Elevated in Healthy Aging. *J Am Med Dir Assoc.*  
731 2017;18(9):810.e1-e4. Epub 2017/07/01. doi: 10.1016/j.jamda.2017.05.018. PubMed  
732 PMID: 28676292; PubMed Central PMCID: PMCPMC5581307.
- 733 42. Caswell PT, Vadrevu S, Norman JC. Integrins: masters and slaves of endocytic  
734 transport. *Nat Rev Mol Cell Biol.* 2009;10(12):843-53. doi: 10.1038/nrm2799. PubMed  
735 PMID: 19904298.
- 736 43. Buckley A, Turner JR. Cell Biology of Tight Junction Barrier Regulation and  
737 Mucosal Disease. *Cold Spring Harb Perspect Biol.* 2018;10(1). Epub 2018/01/02. doi:  
738 10.1101/cshperspect.a029314. PubMed PMID: 28507021; PubMed Central PMCID:  
739 PMCPMC5749156.
- 740 44. Hoffmann C, Berking A, Agerer F, Buntru A, Neske F, Chhatwal GS, et al. Caveolin  
741 limits membrane microdomain mobility and integrin-mediated uptake of fibronectin-binding  
742 pathogens. *J Cell Sci.* 2010;123(Pt 24):4280-91. Epub 2010/11/23. doi: 10.1242/jcs.064006.  
743 PubMed PMID: 21098633.
- 744 45. Sui ZH, Xu H, Wang H, Jiang S, Chi H, Sun L. Intracellular Trafficking Pathways  
745 of *Edwardsiella tarda*: From Clathrin- and Caveolin-Mediated Endocytosis to Endosome  
746 and Lysosome. *Front Cell Infect Microbiol.* 2017;7:400. Epub 2017/09/06. doi:  
747 10.3389/fcimb.2017.00400. PubMed PMID: 28932708; PubMed Central PMCID:  
748 PMCPMC5592743.
- 749 46. Lim JS, Choy HE, Park SC, Han JM, Jang IS, Cho KA. Caveolae-mediated entry of  
750 *Salmonella typhimurium* into senescent nonphagocytotic host cells. *Aging Cell.*  
751 2010;9(2):243-51. Epub 2010/01/20. doi: 10.1111/j.1474-9726.2010.00554.x. PubMed  
752 PMID: 20096033; PubMed Central PMCID: PMCPMC2848979.

753

754

755 **Supporting information**

756 **S1 Video. Mouse preparation for surgery** (steps 1–10). This video shows how to  
757 anesthetize the mouse, apply ophthalmic solution, disinfect, and shave the abdomen.

758

759 **S2 Video. Midline laparotomy** (steps 11–14). This video shown how to open the abdomen  
760 skin, identify the linea alba and open the peritoneal cavity.

761

762 **S3 Video. Procedure to ligate loops** (steps 15–24). This video shows how to identify the  
763 ileum and the proximal colon, remove fecal material from the section to be ligated, identify  
764 the sites to be ligated. Also, shown how to perform the ligations without interruption of the  
765 blood vessels and injection of *C. difficile* spores on ileum and colon.

766

767 **S4 Video. Midline laparotomy closure with suture** (steps 25–27). This video shows how  
768 to suture the abdominal wall and the abdominal skin with silk suture by continuous suture  
769 technique to close the incision and let mice recover from the procedure.

770

771 **S5 Video. Extraction of the ligated loop** (steps 33–34). This video shows how to extract  
772 the ligated loop in a euthanized mouse.

773

774 **S6 Video. Washing and fixing of extracted tissues** (steps 36–44). This video shows how to  
775 open and wash the infected ligated loops and the procedure of fixing with 30% sucrose in  
776 PBS–4% paraformaldehyde.

777



778 **S7 Video. Mounting of immunostained tissues for confocal microscopy** (steps 57–67).

779 This video shows how to orientate the tissues to put the luminal side up of the ileum and the

780 colon, the mounting using mounting medium, and sealing it with Scotch transparent tape.



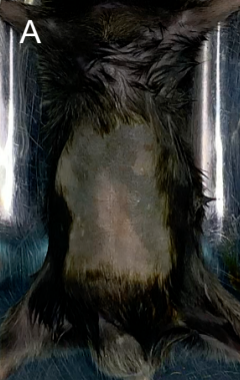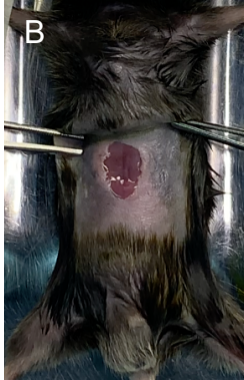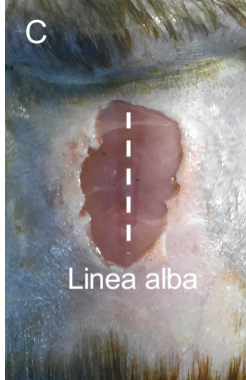

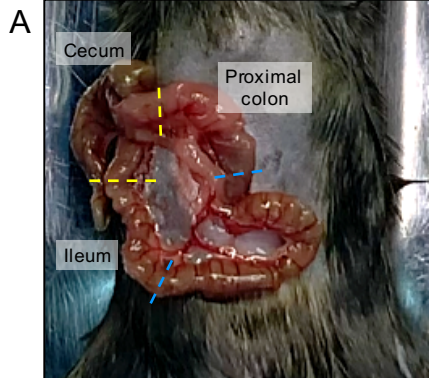

**B** First ligation

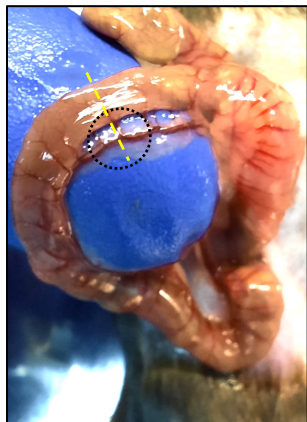

Second ligation

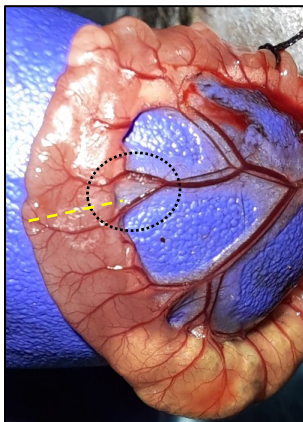

**C** First ligation

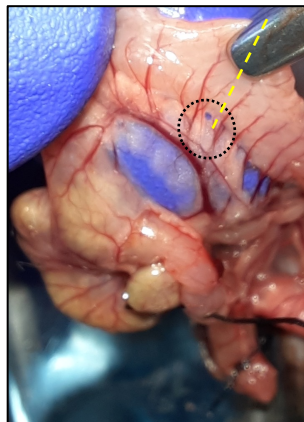

Second ligation

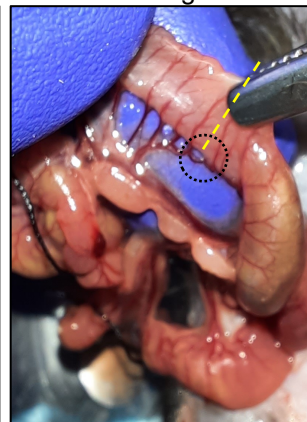

**A****Ileum**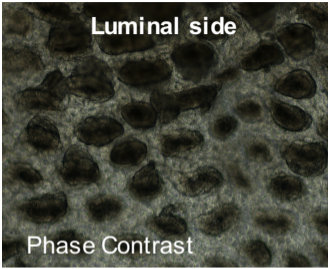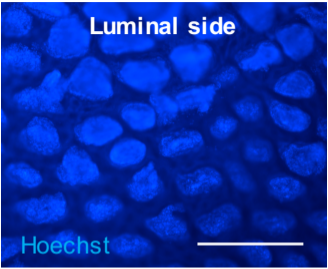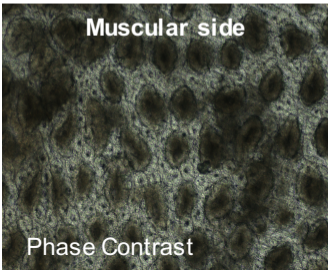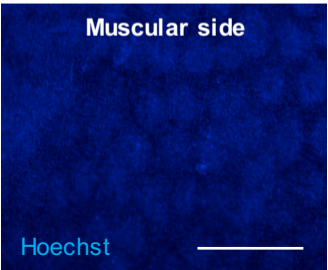**B****Proximal Colon**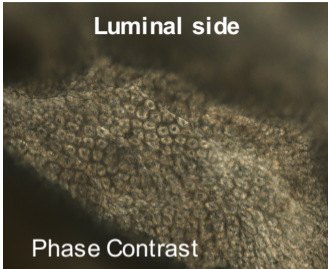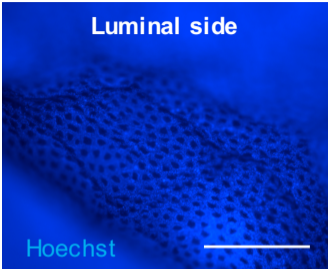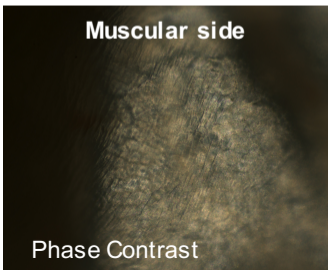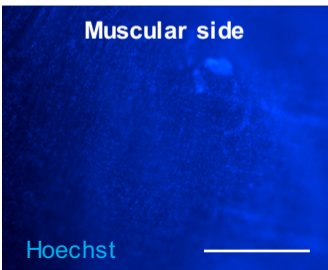

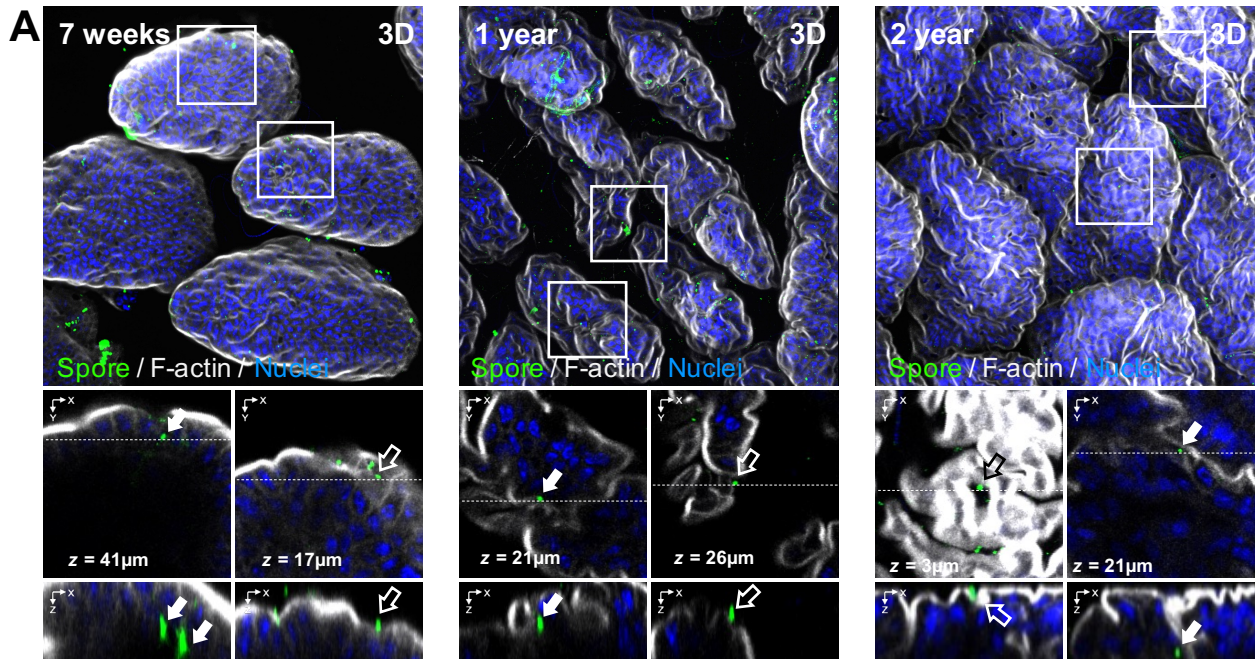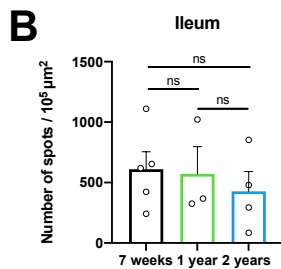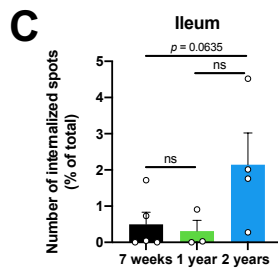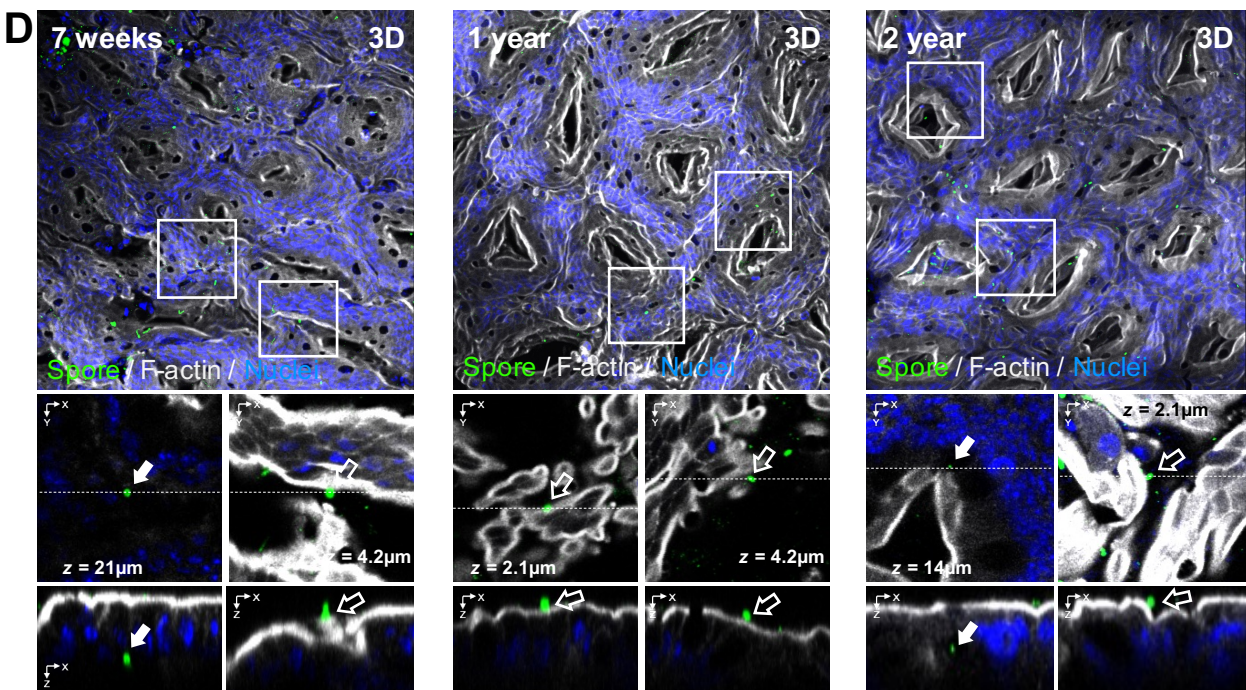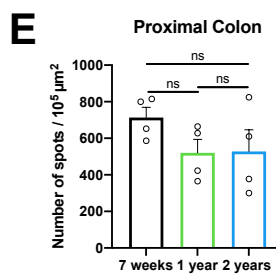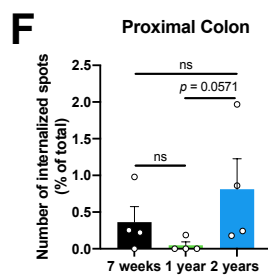

Source: https://www.biorxiv.org/content/10.1101/2021.06.21.449186v1.full.pdf
