# Supplementary material for: A ligated intestinal loop mouse model protocol to study the interactions of Clostridioides difficile spores with the intestinal mucosa during aging
Source: bioRxiv or medRxiv preprint supplement (doi:10.1101/2021.06.21.449186), 2021-06-21

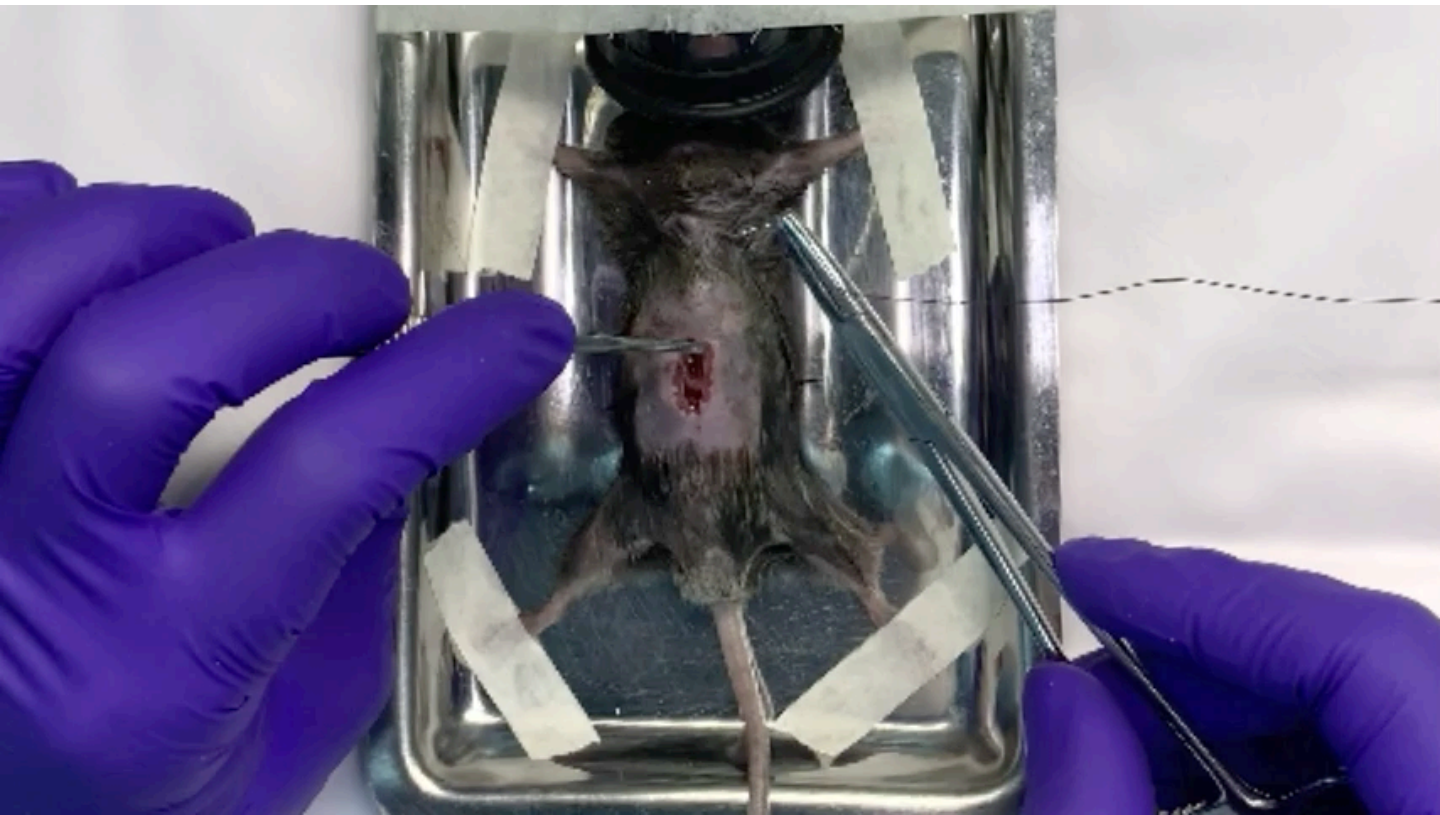

Supplement: Supplementary file [file media-4.pdf]
